# Supplementary material
Source: PubMed Central journal article supplement (PMC8888996)
Supplement: deac001_supplementary_table_s1.pdf [file deac001_supplementary_table_s1.pdf]

**Supplementary Table S1 Differences in insulin dynamics by menstrual cyclicity for hyperandrogenic PCOS.**

| Variables                    | Menstrual cyclicity |                    |                      |                      |                      | P-value between groups (unadjusted for BMI) |                  |                     |                       | P-value between groups (adjusted for BMI) |                      |                |                     |                       |                       |                      |
|------------------------------|---------------------|--------------------|----------------------|----------------------|----------------------|---------------------------------------------|------------------|---------------------|-----------------------|-------------------------------------------|----------------------|----------------|---------------------|-----------------------|-----------------------|----------------------|
|                              | Poly (n = 10)       | Ov-Eumeno (n = 25) | Anov-Eumeno (n = 33) | Early-Oligo (n = 31) | Late-Oligo (n = 119) | Ameno (n = 125)                             | Ameno vs. Poly   | Ameno vs. Ov-Eumeno | Ameno vs. Anov-Eumeno | Ameno vs. Early-Oligo                     | Ameno vs. Late-Oligo | Ameno vs. Poly | Ameno vs. Ov-Eumeno | Ameno vs. Anov-Eumeno | Ameno vs. Early-Oligo | Ameno vs. Late-Oligo |
| <b>Peak INS</b> (µIU/ml)     | 98.1 ± 20.9         | 85.2 ± 25.9        | 110.1 ± 16.1         | 104.9 ± 16.4         | 101.7 ± 8.4          | 181.4 ± 14.5                                | <b>0.006</b>     | <b>0.006</b>        | <b>0.006</b>          | <b>0.035</b>                              | <b>&lt;0.001</b>     | 0.270          | <b>0.037</b>        | 0.230                 | 0.165                 | <b>&lt;0.001</b>     |
| <b>I-AUC</b> (mg/dl/120 min) | 8049.4 ± 1153.3     | 6654.0 ± 1875.9    | 8575.2 ± 1251.8      | 7819.6 ± 1114.1      | 8001.8 ± 670.7       | 14899.6 ± 1261.0                            | <b>&lt;0.001</b> | <b>0.004</b>        | <b>0.012</b>          | <b>&lt;0.001</b>                          | 0.278                | <b>0.033</b>   | 0.184               | 0.098                 | <b>&lt;0.001</b>      |                      |

The measures of hyperinsulinemia (i.e. peak insulin and I-AUC) appeared to be higher among PCOS participants with Amenom and be lower among those with Ov-Eumeno, compared to other menstrual categories, and be similar among those with Poly compared to those with Anov-Eumeno, Early-Oligo or Late-Oligo. Amenom, amenorrhea; Anov-Eumeno, anovulatory eumenorrhea; I-AUC, AUC for insulin; INS, insulin; Oligo, oligomenorrhea; Ov-Eumeno, ovulatory eumenorrhea; PCOS, polycystic ovary syndrome. P values in italics and bold are considered statistically significant.
